# Supplementary material for: Influence of channel height on mixing efficiency and synthesis of iron oxide nanoparticles using droplet-based microfluidics
Source: Royal Society of Chemistry journal article supplement (doi:10.1039/d0ra02470h), 2020-01-01
Supplement: d0ra02470h1.pdf [file d0ra02470h1.pdf]

## Supporting Information

### Influence of channel height on mixing efficiency and synthesis of iron oxide nanoparticles using droplet-based microfluidics

O. Kašpar, A. H. Koyuncu, A. Hubatová-Vacková, M. Balouch, V. Tokárová\*

Department of Chemical Engineering, University of Chemistry and Technology Prague,  
Technická 5, 166 28, Prague 6, Czech Republic, \*[viola.tokarova@vscht.cz](mailto:viola.tokarova@vscht.cz)

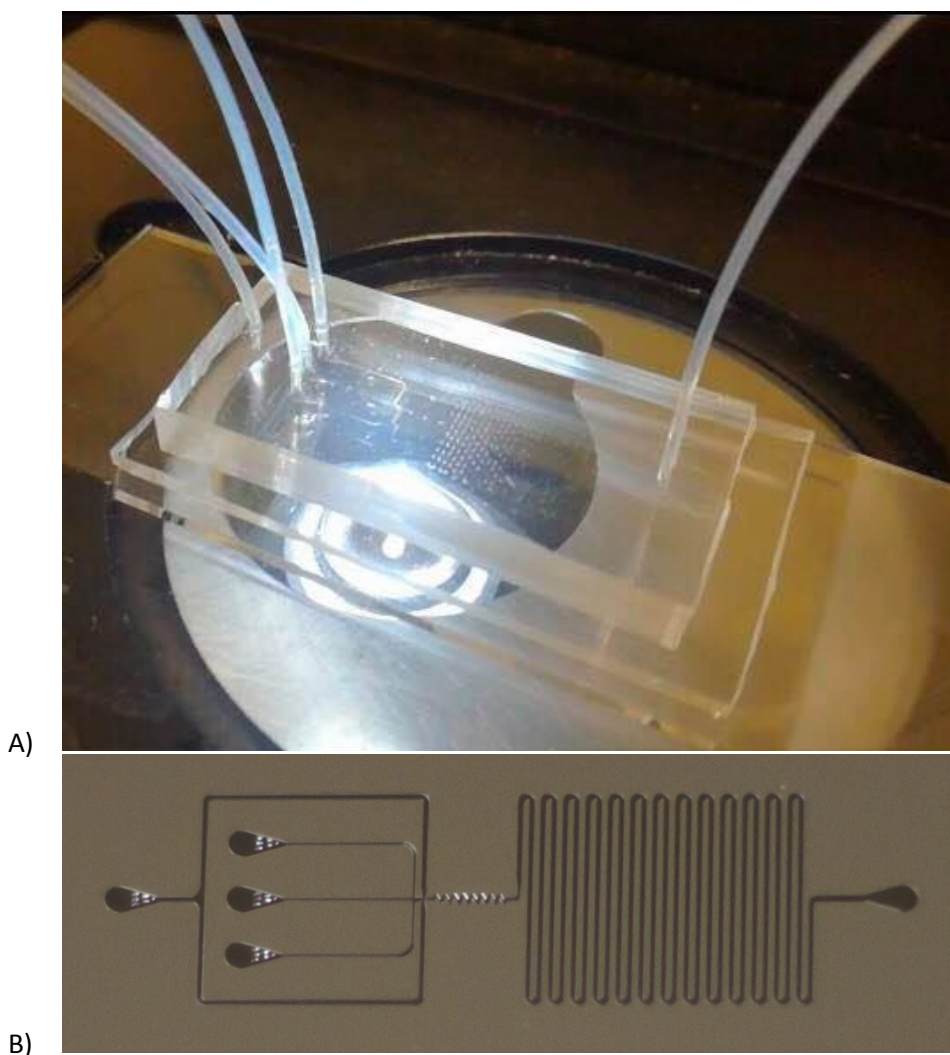

**Fig. SI 1.:** A) Image of the assembled microfluidic chip connected to syringe pumps (four inlets) and one outlet channel for collecting the sample. The droplets are visible in the ageing channel, B) silicon wafer used for replication of the chip channel structure in PDMS

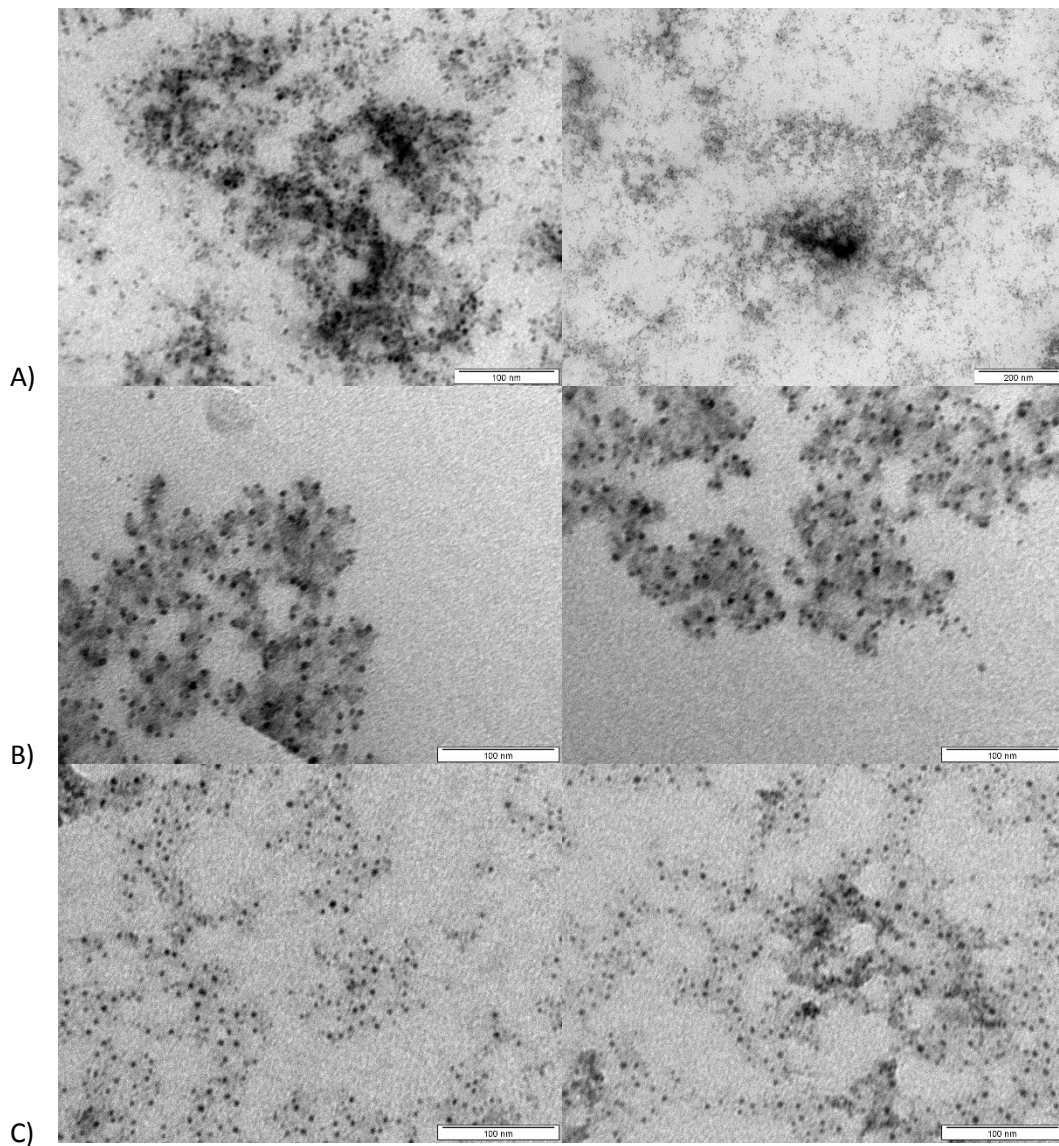

**Fig. SI 2.:** TEM images of iron oxide nanoparticles synthesized in microfluidic chip of different channel height: A) 20 μm, B) 40 μm, C) 60 μm
